# Supplementary material for: A Secreted Form of the Hepatitis E Virus ORF2 Protein: Design Strategy, Antigenicity and Immunogenicity
Source: MDPI journal article supplement (doi:10.3390/v14102122), 2022-09-26
Supplement: s1 [file s1]

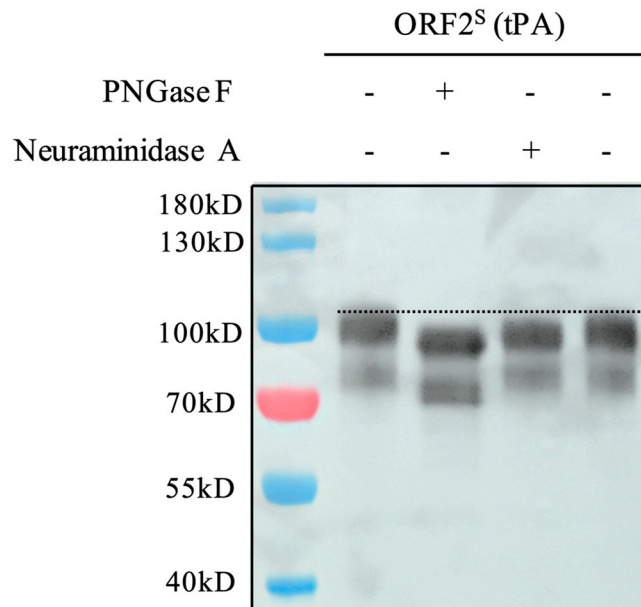

**Figure S1. Glycosylation analysis of ORF2<sup>S</sup> (tPA) protein.** HEV ORF2<sup>S</sup> (tPA) proteins were denatured and digested with indicated glycosidases (+) or not (-). The dashed line shows the mobility shift on nitrocellulose filter membrane of ORF2<sup>S</sup> (tPA) proteins to assess the extent of de-glycosylation.

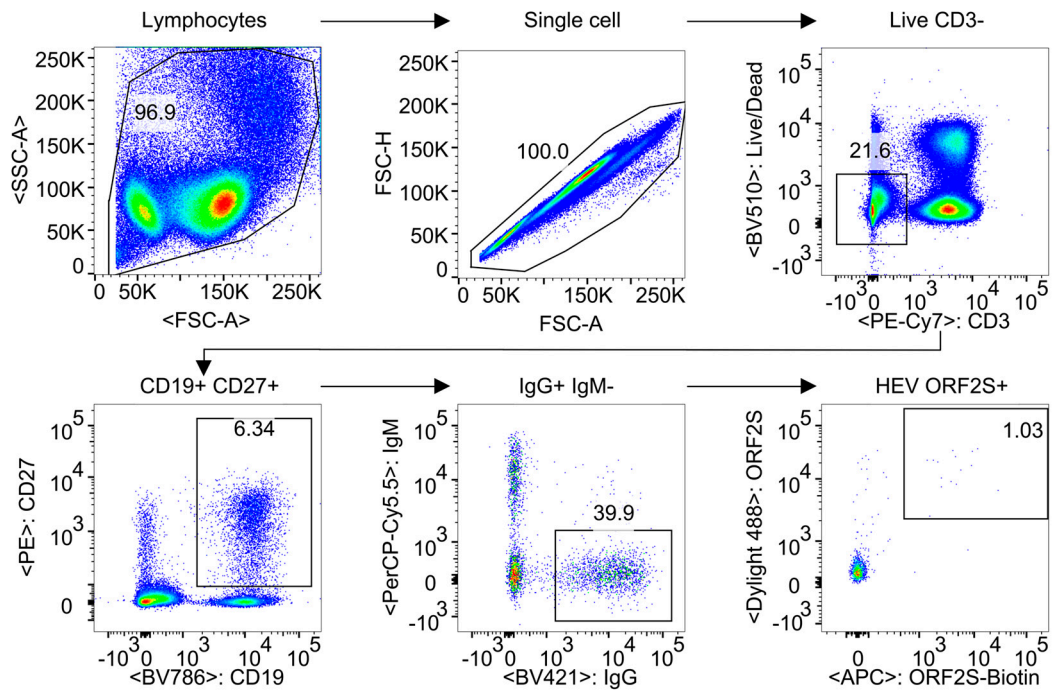

**Figure S2. Flow cytometry analysis of cell.** Gating strategy for recognizing ORF2<sup>S</sup>-specific memory B cells through BD Arial III flow cytometer. FSC-A, forward scatter area; SSC-A, side scatter area.
